# Supplementary material for: In situ surface alkalinized g-C3N4 toward enhancement of photocatalytic H2 evolution under visible-light irradiation
Source: Royal Society of Chemistry journal article supplement (doi:10.1039/c5ta05128b), 2015-08-05
Supplement: c5ta05128b1.pdf [file c5ta05128b1.pdf]

## Supporting Information

### **In-Situ Surface Alkalinized g-C<sub>3</sub>N<sub>4</sub> toward Enhancement of Photocatalytic H<sub>2</sub> Evolution under Visible-Light Irradiation**

Yunxiang Li,<sup>ab</sup> Hua Xu,<sup>abc</sup> Shuxin Ouyang,<sup>abc\*</sup> Da Lu,<sup>ab</sup> Xin Wang,<sup>ab</sup> Defa Wang<sup>abc</sup> and Jinhua Ye<sup>abcd\*</sup>

<sup>a</sup> TU-NIMS Joint Research Center, School of Materials Science and Engineering, Tianjin University, Tianjin 300072, P.R. China

<sup>b</sup> Collaborative Innovation Center of Chemical Science and Engineering (Tianjin), Tianjin 30072, P. R. China

<sup>c</sup> Tianjin Key Laboratory of Composite and Functional Materials, and Key Lab of Advanced Ceramics and Machining Technology, Ministry of Education, Tianjin 300072, PR China

<sup>d</sup> International Center for Materials Nanoarchitectonics (WPI-MANA) and Environmental Remediation Materials Unit, National Institute for Materials Science (NIMS), Japan

\*Author to whom correspondence should be addressed.

Email: [oysx@tju.edu.cn](mailto:oysx@tju.edu.cn); [jinhua.ye@nims.go.jp](mailto:jinhua.ye@nims.go.jp)

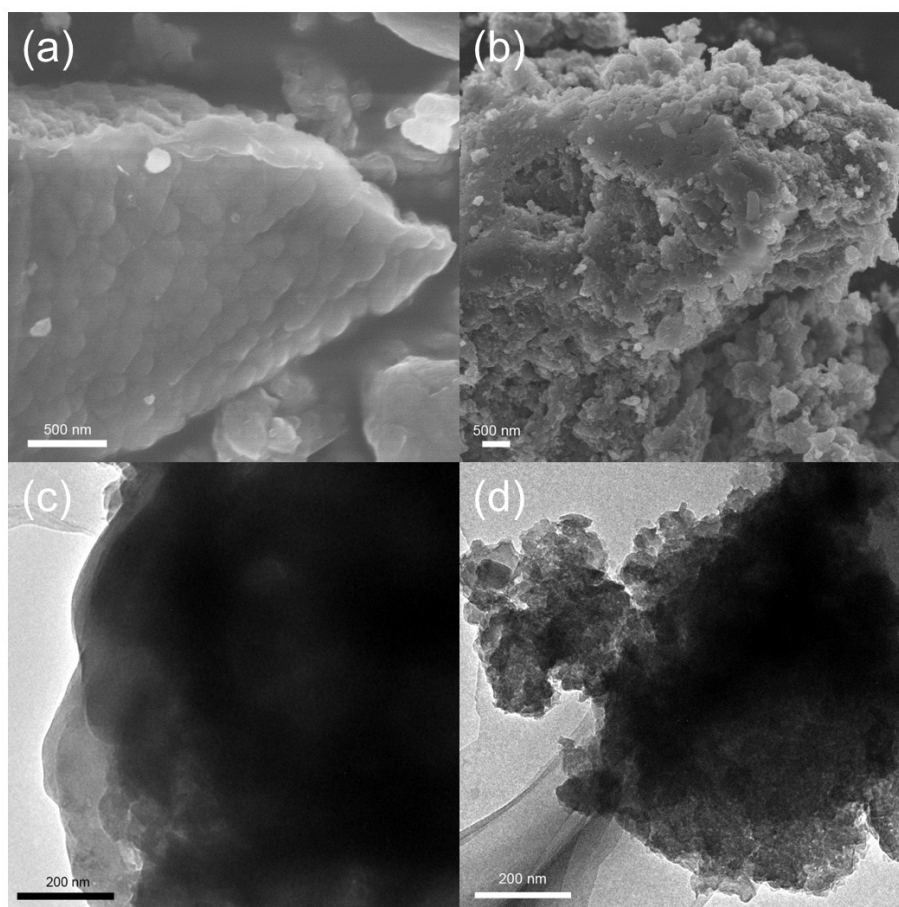

Figure S1. The SEM images of the pristine CN (a) and the CN-KCl/0.1gNH<sub>4</sub>Cl (b) and TEM images of the pristine CN (c) and the CN-KCl/0.1gNH<sub>4</sub>Cl (d).

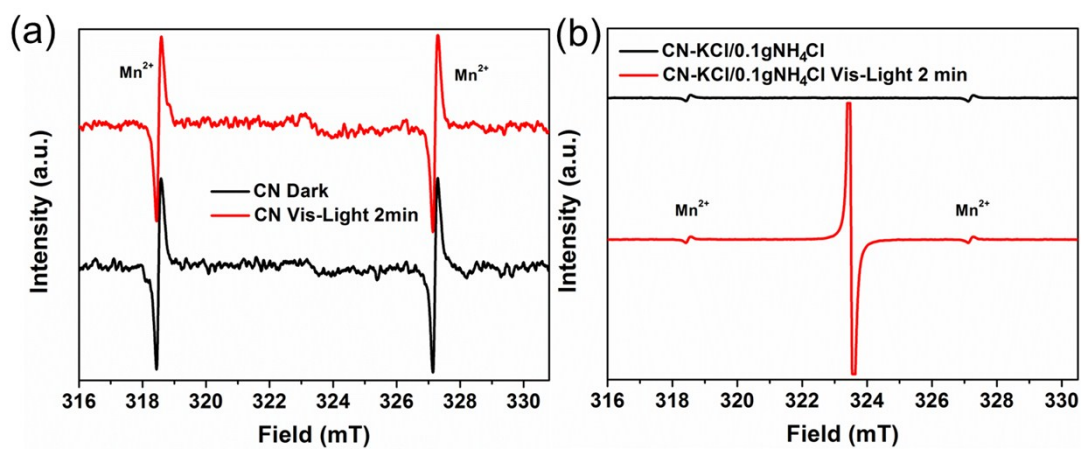

Figure S2. ESR spectra measured in the aqueous solution of the pristine CN (a) and CN-KCl/0.1gNH<sub>4</sub>Cl (b) without DMPO exposed to visible light ( $420 < \lambda < 800$  nm).

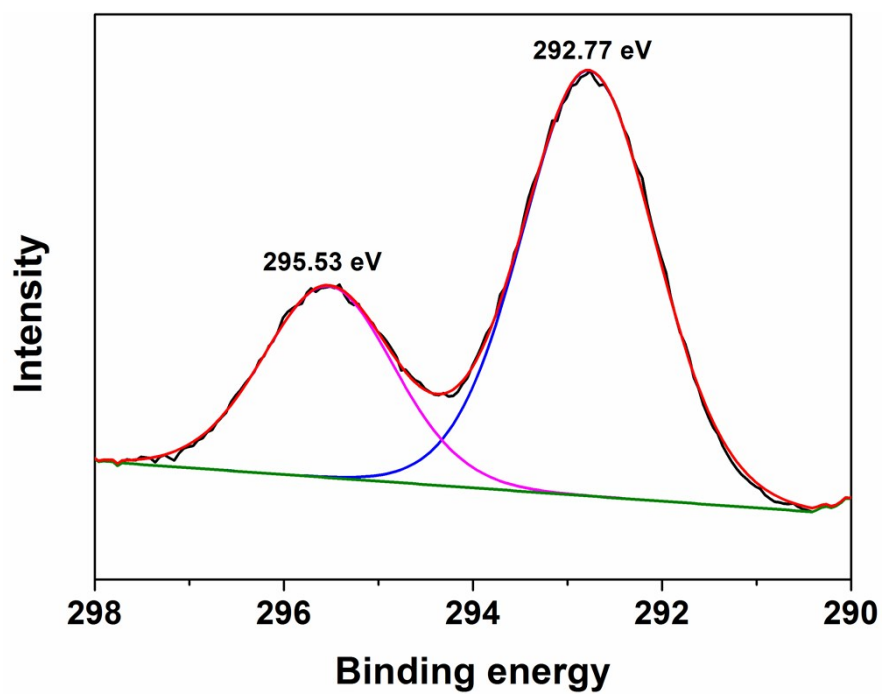

Figure S3. K 2p XPS spectra of the CN-KCl/0.1gNH<sub>4</sub>Cl sample.

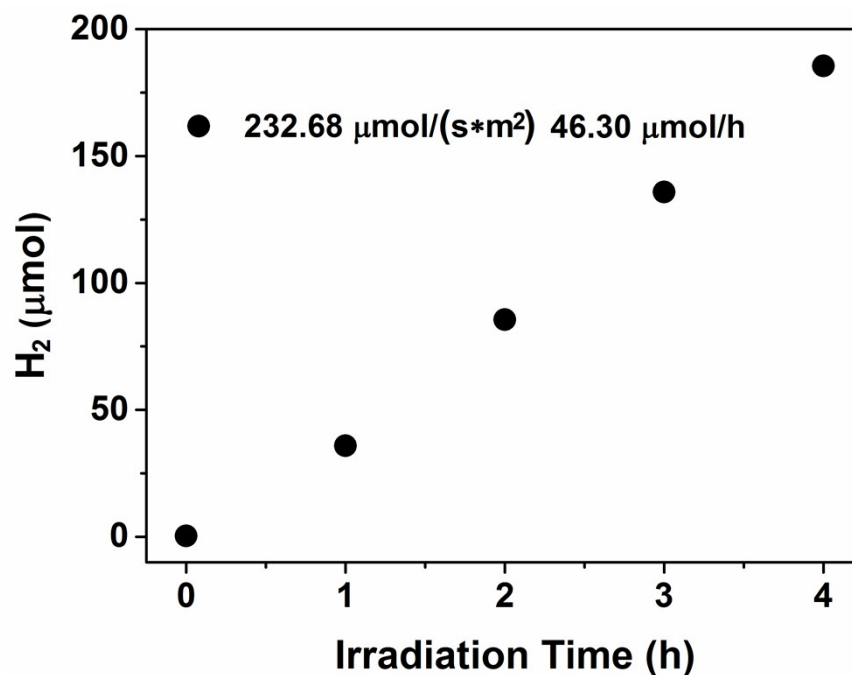

Figure S4. The photocatalytic activity of CN-KCl/0.1gNH<sub>4</sub>Cl for AQY determination. A time course of H<sub>2</sub> production from water under 300 W Xenon lamp using a ~420 nm band-pass filter.

In one hour,

$$N(\text{H}_2) = 46.30 \text{ } \mu\text{mol};$$

$$N(\text{photon}) = 232.68 \text{ } \mu\text{mol}/(\text{s}\cdot\text{m}^2) \cdot 19.36 \text{ cm}^2 \cdot 3600 \text{ s} = 1621.68 \text{ } \mu\text{mol};$$

thus,

$$\text{AQY (\%)} = [2 \times N(\text{H}_2) / N(\text{photon})] \times 100\% = 2 \times 46.30 / 1621.68 \times 100\% = 5.7\%$$

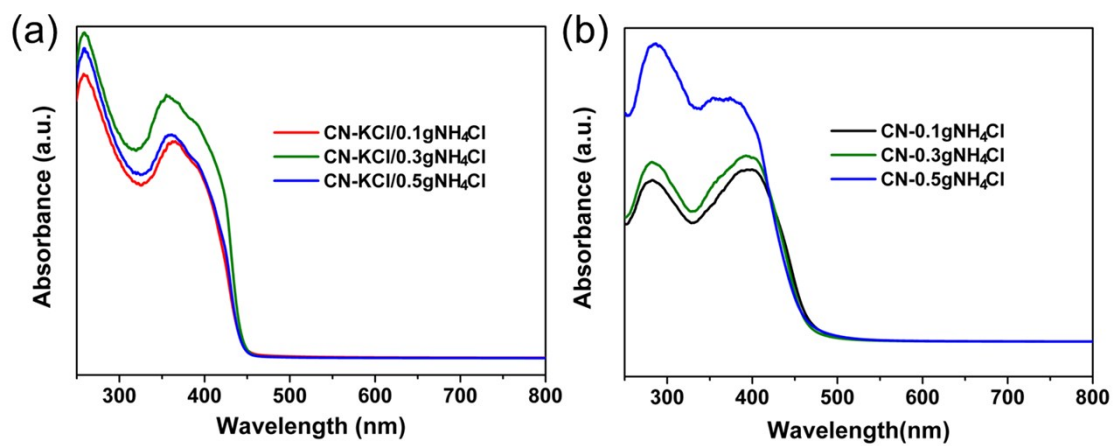

Figure S5. UV-visible absorption spectra of CN-KCl/xNH<sub>4</sub>Cl (a) and CN-yNH<sub>4</sub>Cl (b).

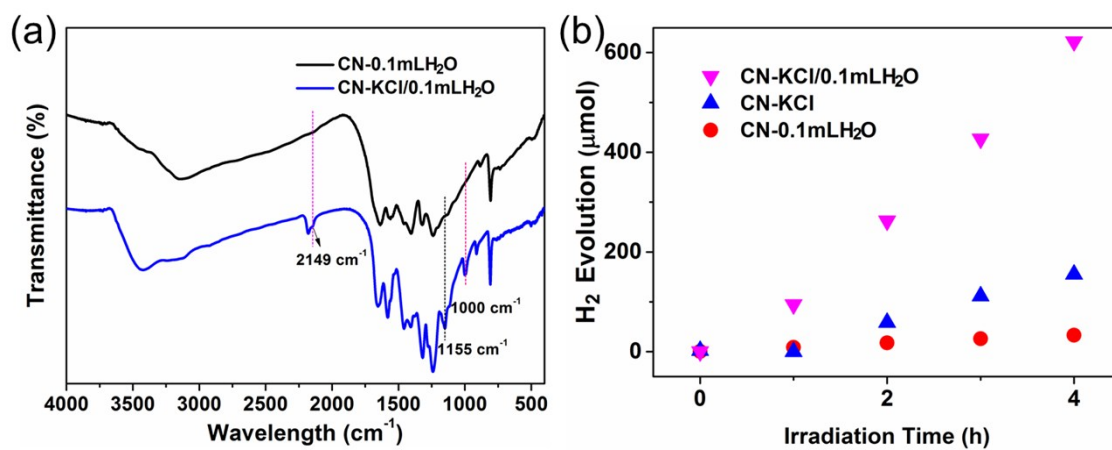

Figure S6. (a) FT-IR spectra of CN-0.1mLH<sub>2</sub>O and CN-KCl/0.1mLH<sub>2</sub>O. (b) Comparison of photocatalytic activities for H<sub>2</sub> evolution of CN-0.1mLH<sub>2</sub>O and CN-KCl/0.1mLH<sub>2</sub>O.

Table S1. Comparison of AQY for different modification g-C<sub>3</sub>N<sub>4</sub>

| Samples                                                        | H <sub>2</sub> evolution rate<br>( $\mu\text{mol/h}$ ) | AQY<br>(%) | Notes                                                              |
|----------------------------------------------------------------|--------------------------------------------------------|------------|--------------------------------------------------------------------|
| CN-KCl/0.1gNH <sub>4</sub> Cl<br>(this paper)                  | 151 ( $\lambda > 400$ nm)                              | 5.7        | 100 mg, 2 wt% Pt<br>$\lambda = 420$ nm, $6.4 \text{ mW cm}^{-2}$   |
| HCNS <sup>1</sup>                                              | 574 ( $\lambda > 420$ nm)                              | 9.6        | 40 mg, 3 wt% Pt<br>$\lambda = 420.5$ nm                            |
| Nanospherical g-<br>C <sub>3</sub> N <sub>4</sub> <sup>2</sup> | 224 ( $\lambda > 420$ nm)                              | 7.5        | 50 mg, 3 wt% Pt<br>$\lambda = 420.5$ nm, $49.4 \text{ mW cm}^{-2}$ |
| Intercalated g-C <sub>3</sub> N <sub>4</sub> <sup>3</sup>      | 502 ( $\lambda > 420$ nm)                              | 21.2       | 100 mg, 3 wt% Pt<br>$\lambda = 420$ nm, $2 \text{ mW cm}^{-2}$     |

<sup>1</sup> J. Zhang, M. Zhang, C. Yang, and X. Wang, *Adv. Mater.* **26**, 4121 (2014).

<sup>2</sup> J. Sun, J. Zhang, M. Zhang, M. Antonietti, X. Fu, and X. Wang, *Nature Communications*, 1139 (2012).

<sup>3</sup> H. Gao, S. Yan, J. Wang, Y. A. Huang, P. Wang, Z. Li, and Z. Zou, *Phys. Chem. Chem. Phys.* **15**, 18077 (2013).



Table S2. Best fitted parameters of time-resolved PL spectra

| Samples                       | Decay life times (ns) |          |          | Fractional contribution |       |       | Goodness of fit parameter ( $\chi^2$ ) |
|-------------------------------|-----------------------|----------|----------|-------------------------|-------|-------|----------------------------------------|
|                               | $\tau_1$              | $\tau_2$ | $\tau_3$ | $f_1$                   | $f_2$ | $f_3$ |                                        |
| CN                            | 5.76                  | 1.23     | 38.23    | 39.17                   | 46.82 | 14.01 | 1.39                                   |
| CN-0.1gNH <sub>4</sub> Cl     | 5.02                  | 0.99     | 33.22    | 36.39                   | 49.87 | 13.74 | 1.37                                   |
| CN-KCl                        | 3.01                  | 0.43     | 26.10    | 24.92                   | 69.04 | 6.05  | 1.38                                   |
| CN-KCl/0.1gNH <sub>4</sub> Cl | 2.53                  | 0.32     | 27.25    | 18.34                   | 75.82 | 5.34  | 1.22                                   |

Table S3. Comparison of H<sub>2</sub> evolution rate for different approaches to alkalinization over g-C<sub>3</sub>N<sub>4</sub>

| Samples                                   | Approach to alkalinization                  | H <sub>2</sub> evolution rate of the pristine samples (μmol/h) | H <sub>2</sub> evolution rate of the modified samples (μmol/h) | Notes                                                 |
|-------------------------------------------|---------------------------------------------|----------------------------------------------------------------|----------------------------------------------------------------|-------------------------------------------------------|
| CN-KCl/0.1gNH <sub>4</sub> Cl (this work) | In situ                                     | 10                                                             | 151                                                            | 100 mg, 2 wt% Pt (λ > 400 nm)<br>Melamine (precursor) |
| CN-H1 <sup>5</sup>                        | Soaking sample in alkaline solution         | 33                                                             | 73                                                             | 30 mg, 3 wt% Pt (λ > 420 nm)<br>Urea                  |
| D52 <sup>4</sup>                          | Tuning the pH of the photoreaction solution | ~8 (pH=4.5)                                                    | 47 (pH=13.3)                                                   | 30 mg, 1 wt% Pt (λ > 400 nm)<br>dicyandiamide         |

4. P. Wu, J. Wang, J. Zhao, L. Guo and F. E. Osterloh, *Chem. Commun.*, 2014, **50**, 15521-15524.
5. X. L. Wang, W. Q. Fang, H. F. Wang, H. Zhang, H. Zhao, Y. Yao and H. G. Yang, *Journal of Materials Chemistry A*, 2013, **1**, 14089.
